# Supplementary material for: Polymerized ionic liquid Co-catalysts driving photocatalytic CO2 transformation
Source: Royal Society of Chemistry journal article supplement (doi:10.1039/d4su00194j), 2024-01-01
Supplement: d4su00194j1.pdf [file d4su00194j1.pdf]

## Polymerized Ionic Liquid Co-Catalysts Driving Photocatalytic CO<sub>2</sub> Transformation

Lisa Eisele<sup>a</sup>, Blete Hulaj<sup>a</sup>, Maximilian Podsednik<sup>b</sup>, Francesco Laudani<sup>c</sup>, Pablo Ayala<sup>d</sup>, Alexey Cherevan<sup>d</sup>, Annette Foelske<sup>c</sup>, Andreas Limbeck<sup>e</sup>, Dominik Eder<sup>d\*</sup> and Katharina Bica-Schröder<sup>a\*</sup>

### Contents

|                                                                            |   |
|----------------------------------------------------------------------------|---|
| S1 Fourier transform infrared spectroscopy of synthesized materials: ..... | 2 |
| S2 Thermogravimetric analysis of polymers: .....                           | 2 |
| S3 XPS Survey spectra of CLP-1: .....                                      | 3 |
| S4 XPS detailed scans of Cl 2p: .....                                      | 3 |
| S5 XPS detailed scans of N 1s: .....                                       | 4 |
| S6 LA-ICP-MS scan lines:.....                                              | 4 |
| S7 EDX scans of sample particles:.....                                     | 5 |
| S8 UV-Vis spectroscopy of aged reaction solution: .....                    | 5 |
| S9 Calculations of Reaction parameters:.....                               | 5 |

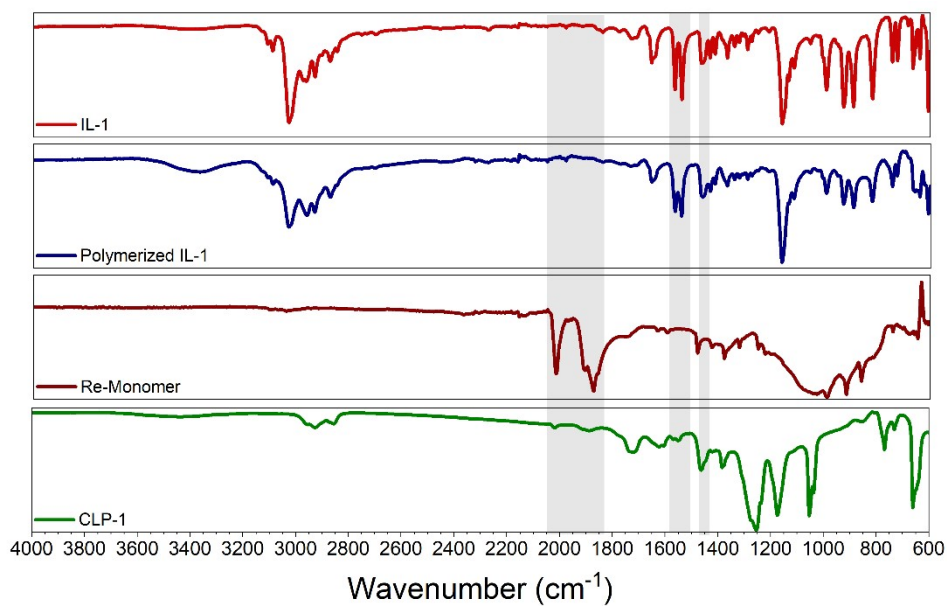

Figure S1: FT-IR spectroscopy of ionic liquid (IL-1)( red), polymerized ionic liquid (PIL) (blue), Re-Monomer (and CLP-1

S1 Fourier transform infrared spectroscopy of synthesized materials:

S2 Thermogravimetric analysis of polymers:

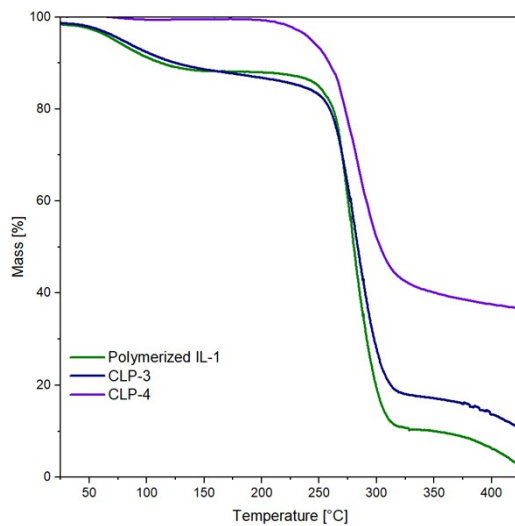

Figure S2: TGA of polymerized IL-1, CLP-3 and CLP-4

### S3 XPS Survey spectra of CLP-1:

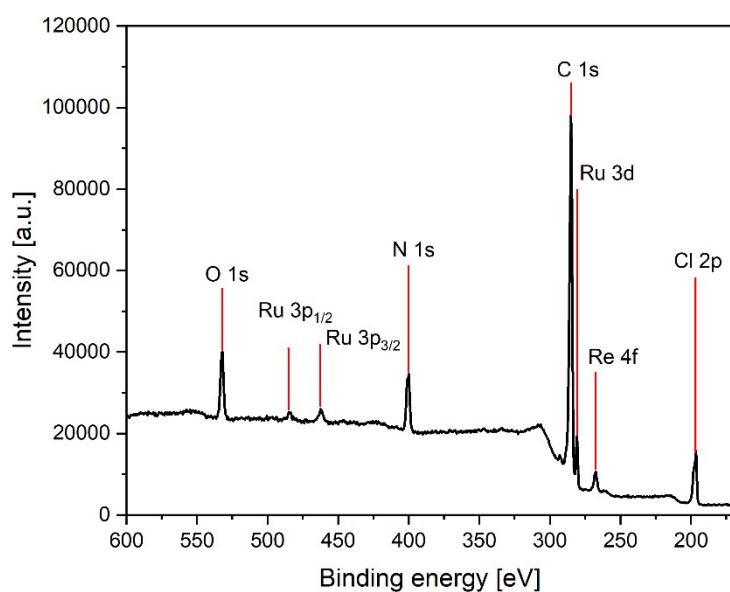

Figure S3: XPS Survey spectra of CLP-1.

### S4 XPS detailed scans of Cl 2p:

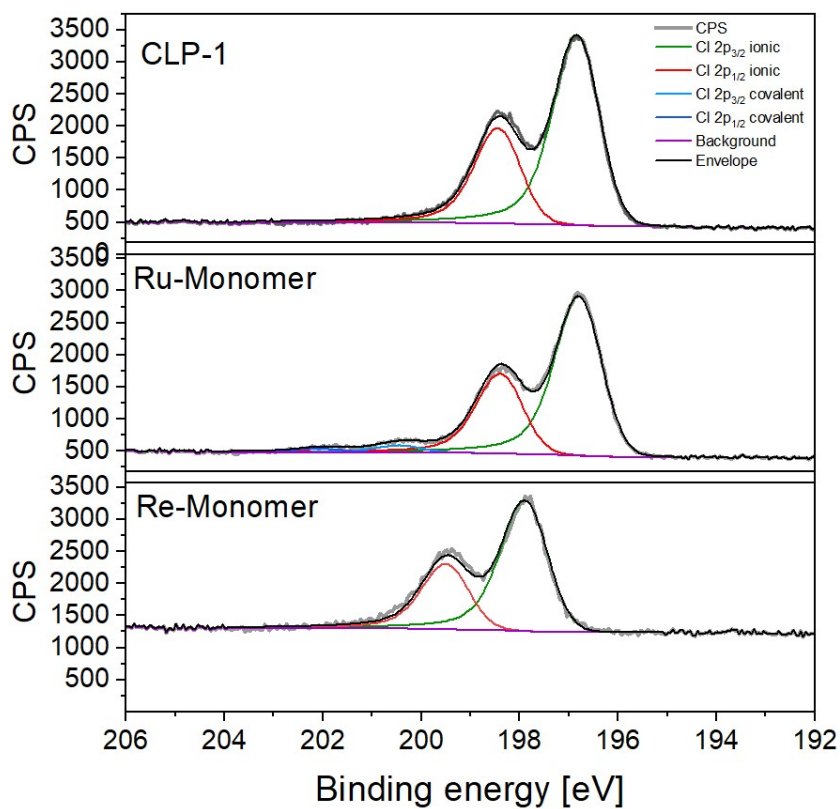

Figure S4: XPS detailed scans of Cl 2p.

S5 XPS detailed scans of N 1s:

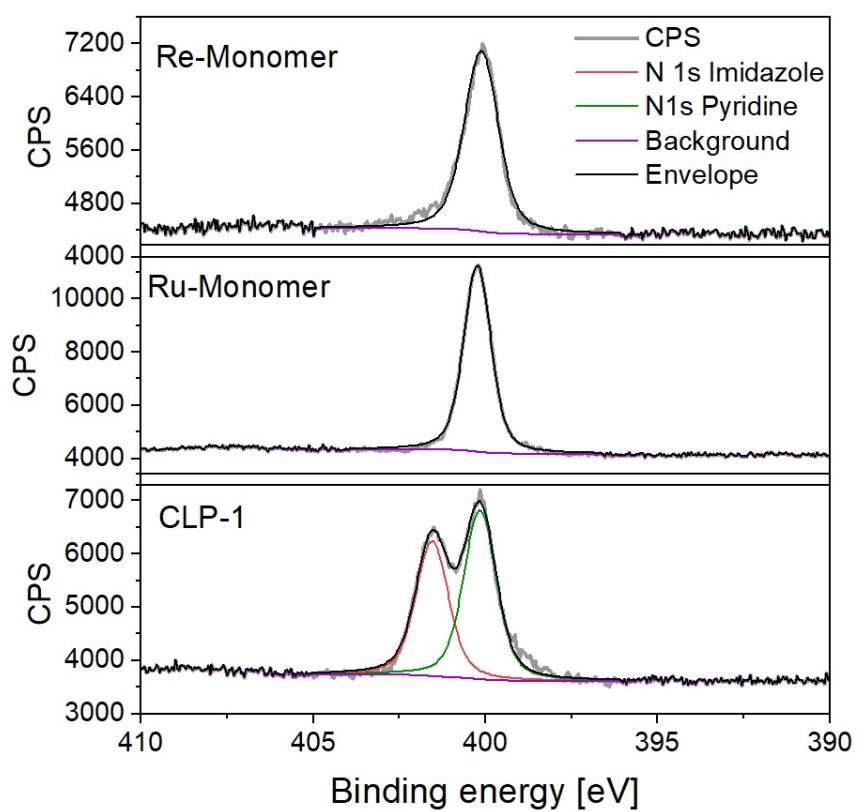

Figure S5: XPS scans of N 1s.

S6 LA-ICP-MS scan lines:

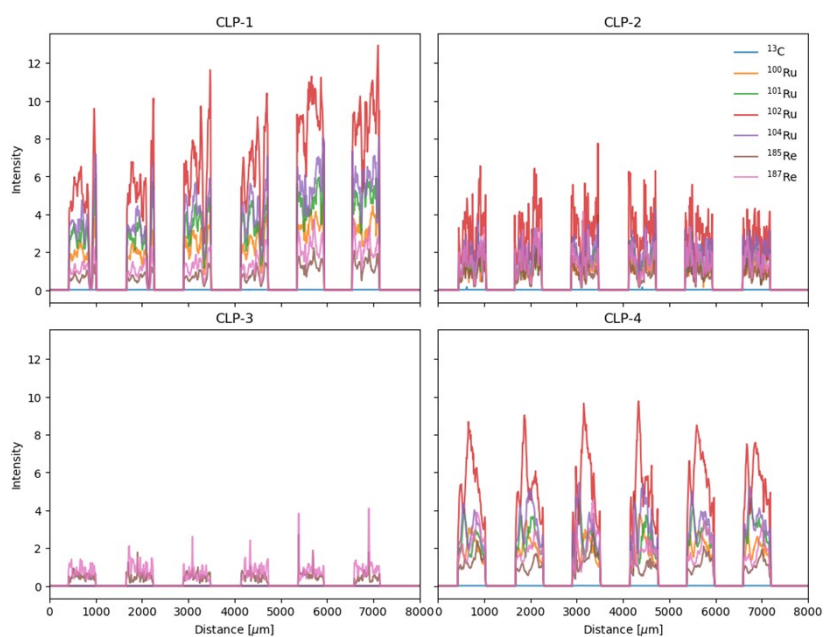

Figure S6: LA-ICP-MS Scans of isotopes in polymers CLP-1 to CLP-4

S7 EDX scans of sample particles:

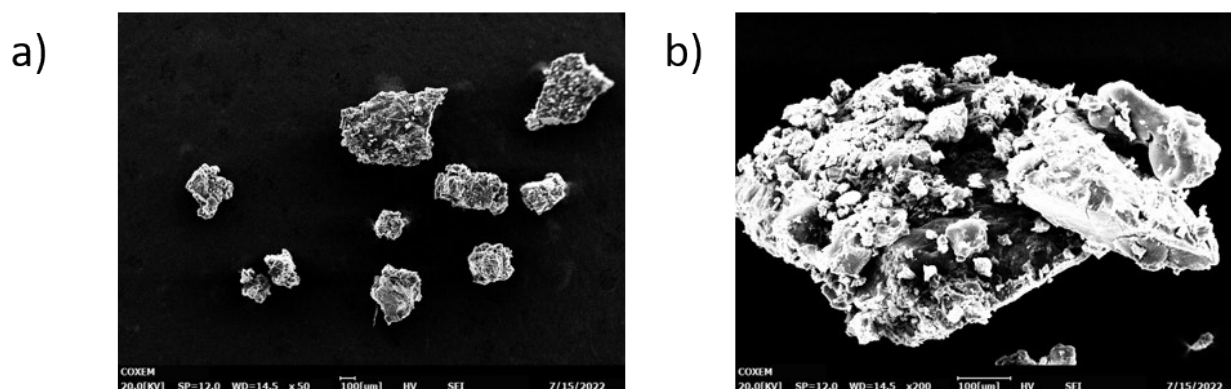

Figure S7: EDX Scans of sample particles of CLP-1. Several particles (a) and closeup (b).

S8 UV-Vis spectroscopy of aged reaction solution:

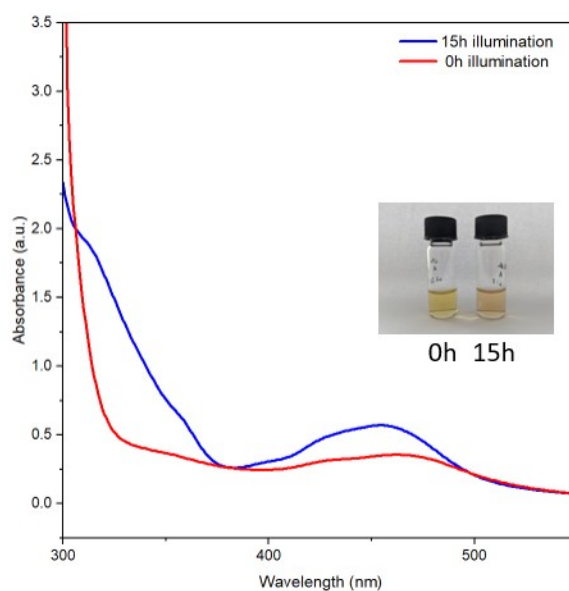

Figure 8: UV Vis spectra of reaction solution after 15h of illumination (blue) and 0h of illumination (red).

S9 Calculations of Reaction parameters:

Reactor parameters:

|                        |       |
|------------------------|-------|
| Reactor volume (ml)    | 3.7   |
| Reaction volume (ml)   | 1.5   |
| Reactor headspace (ml) | 2.2   |
| Reaction time (sec)    | 53000 |

Conversion from ppm to Gas volume in mL:

$$\text{Gas volume in mL} = \frac{\text{ppm} \times \text{Reactor headspace (mL)}}{10^9}$$

Calculation of gas amount in moles by ideal gas law:

$$n(\mu\text{mol}) = \frac{pV}{RT}$$

With parameters:

P is pressure = 101.325 Pa

R is gas constant = 8.314 J mol<sup>-1</sup> K<sup>-1</sup>

T is temperature = 295 K

Turnover number (TON) is calculated as following:

$$TON = \frac{\text{number of moles of CO}}{\text{number of moles of catalyst}}$$

The turnover frequency (TOF) can be calculated from TON divided by the reaction time in minutes:

$$TOF (\text{min}^{-1}) = \frac{TON}{\text{time [min]}}$$

The instant TOF is defined as the first derivative (d) of TON against time:

$$\text{Instant TOF}(\text{min}^{-1}) = \frac{d(TON)}{d(\text{time})}$$
